# Supplementary material for: Accuracy of genotype imputation in Labrador Retrievers
Source: PubMed Central journal article supplement (PMC6055857; doi:10.1111/age.12677), 2018-07-05
Supplement: AGE-49-303-s001.pdf [file AGE-49-303-s001.pdf]

**Table S1** Average genomic relationship between dogs in the reference and validation set for every scenario. For every dog in the validation set, the average and the maximum genomic relatedness (GRmean; GRmax) with the dogs in the reference set were calculated

| Scenario | GRmean | GRmax |
|----------|--------|-------|
| Ref10    | 0.04   | 0.13  |
| Ref50    | 0.04   | 0.17  |
| Ref90    | 0.04   | 0.18  |
| REL      | 0.04   | 0.18  |
| REL-C    | 0.04   | 0.17  |
