# Supplementary material for: Accuracy of genotype imputation in Labrador Retrievers
Source: PubMed Central journal article supplement (PMC6055857; doi:10.1111/age.12677), 2018-07-05
Supplement: AGE-49-303-s002.pdf [file AGE-49-303-s002.pdf]

**Table S2** Marker spacing (in kbp) on the HighD and LowD arrays for CFA1

| Array | Masked<br>markers<br>(%) | n    | Average | SD  | Min    | Max  | Range |
|-------|--------------------------|------|---------|-----|--------|------|-------|
| HighD | 0                        | 5826 | 21      | 23  | 0.02   | 486  | 486   |
| LowD  | 50                       | 2913 | 42      | 35  | 0.84   | 531  | 530   |
| LowD  | 75                       | 1457 | 84      | 53  | 8.32   | 550  | 542   |
| LowD  | 87.5                     | 728  | 168     | 85  | 57.96  | 730  | 672   |
| LowD  | 93.8                     | 365  | 336     | 137 | 152.22 | 909  | 757   |
| LowD  | 96.9                     | 183  | 672     | 238 | 347.00 | 1716 | 1369  |
| LowD  | 98.4                     | 92   | 1343    | 378 | 715.76 | 2969 | 2253  |
