# Supplementary material for: Accuracy of genotype imputation in Labrador Retrievers
Source: PubMed Central journal article supplement (PMC6055857; doi:10.1111/age.12677), 2018-07-05
Supplement: AGE-49-303-s003.pdf [file AGE-49-303-s003.pdf]

**Table S3** Animal-wise imputation accuracy (% correct and corr) for the 10 replicates of the control scenario REL-C

| Control | Proportion of correctly imputed genotypes (% correct) | Correlation between true and imputed genotypes (corr) |
|---------|-------------------------------------------------------|-------------------------------------------------------|
| REL-C1  | 97.699                                                | 0.926                                                 |
| REL-C2  | 97.575                                                | 0.924                                                 |
| REL-C3  | 97.585                                                | 0.923                                                 |
| REL-C4  | 97.747                                                | 0.928                                                 |
| REL-C5  | 97.609                                                | 0.924                                                 |
| REL-C6  | 97.732                                                | 0.926                                                 |
| REL-C7  | 97.717                                                | 0.928                                                 |
| REL-C8  | 97.826                                                | 0.933                                                 |
| REL-C9  | 97.603                                                | 0.924                                                 |
| REL-C10 | 97.587                                                | 0.925                                                 |
